# Supplementary material
Source: publisher site journal article supplement (https://www.e-cmh.org/upload/media/cmh-2018-0073-suppl3.pdf)
Supplement: Supplementary file 1 [file cmh-2018-0073-suppl3.pdf]

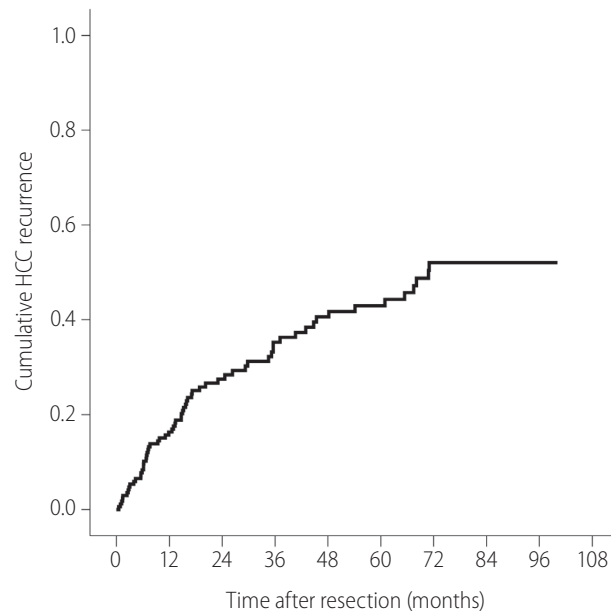

**Supplementary Figure 2.** Cumulative incidence of hepatocellular carcinoma (HCC) recurrence in the study population. The cumulative incidence of HCC recurrence at 1, 2, 3, and 5 years was 15.8%, 25.3%, 30.0%, and 34.1%, respectively.
